# Supplementary material
Source: Springer Nature journal article supplement (https://www.springermedizin.de/resource/supplementary/12889_2011_3829_MOESM1_ESM.pdf/9489886)
Supplement: MOESM1 [file 9489886]

## Intervention Research

### 1. Understanding the problem

#### Types of research

- Epidemiology and demography
- Biomedical
- Descriptive
- Etiological
- Social behavioural and organisational research
- Measurement
- Systematic reviews

*Describe the nature and scope of the problem and develop solutions*

Impact and outcome assessment

Process evaluation

### 2. Testing for efficacy

#### Types of research

- Efficacy studies

*Assess causal relationships between exposure to an intervention and an outcome*

### 3. Testing for replicability

#### Types of research

- Intervention replication studies

*Assess practicality of implementing efficacious interventions in new populations or settings under real world conditions*

### 4. Testing for dissemination

#### Types of research

- Intervention dissemination studies

*Assess widespread intervention roll-out in communities & across systems*

Scale and reach of the intervention
